# Supplementary figures and images for: Photothermal Responsivity of van der Waals Material-Based Nanomechanical Resonators
Source: MDPI journal article supplement (doi:10.3390/nano12152675), 2022-08-04

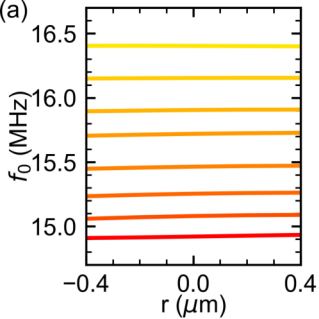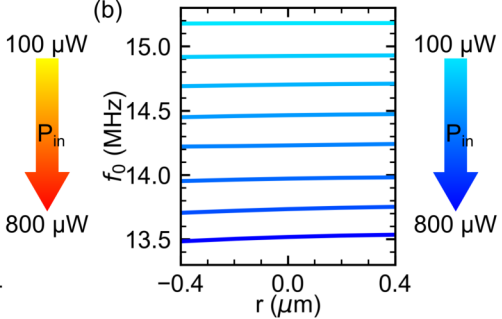

Supplement: s1 [file s1]

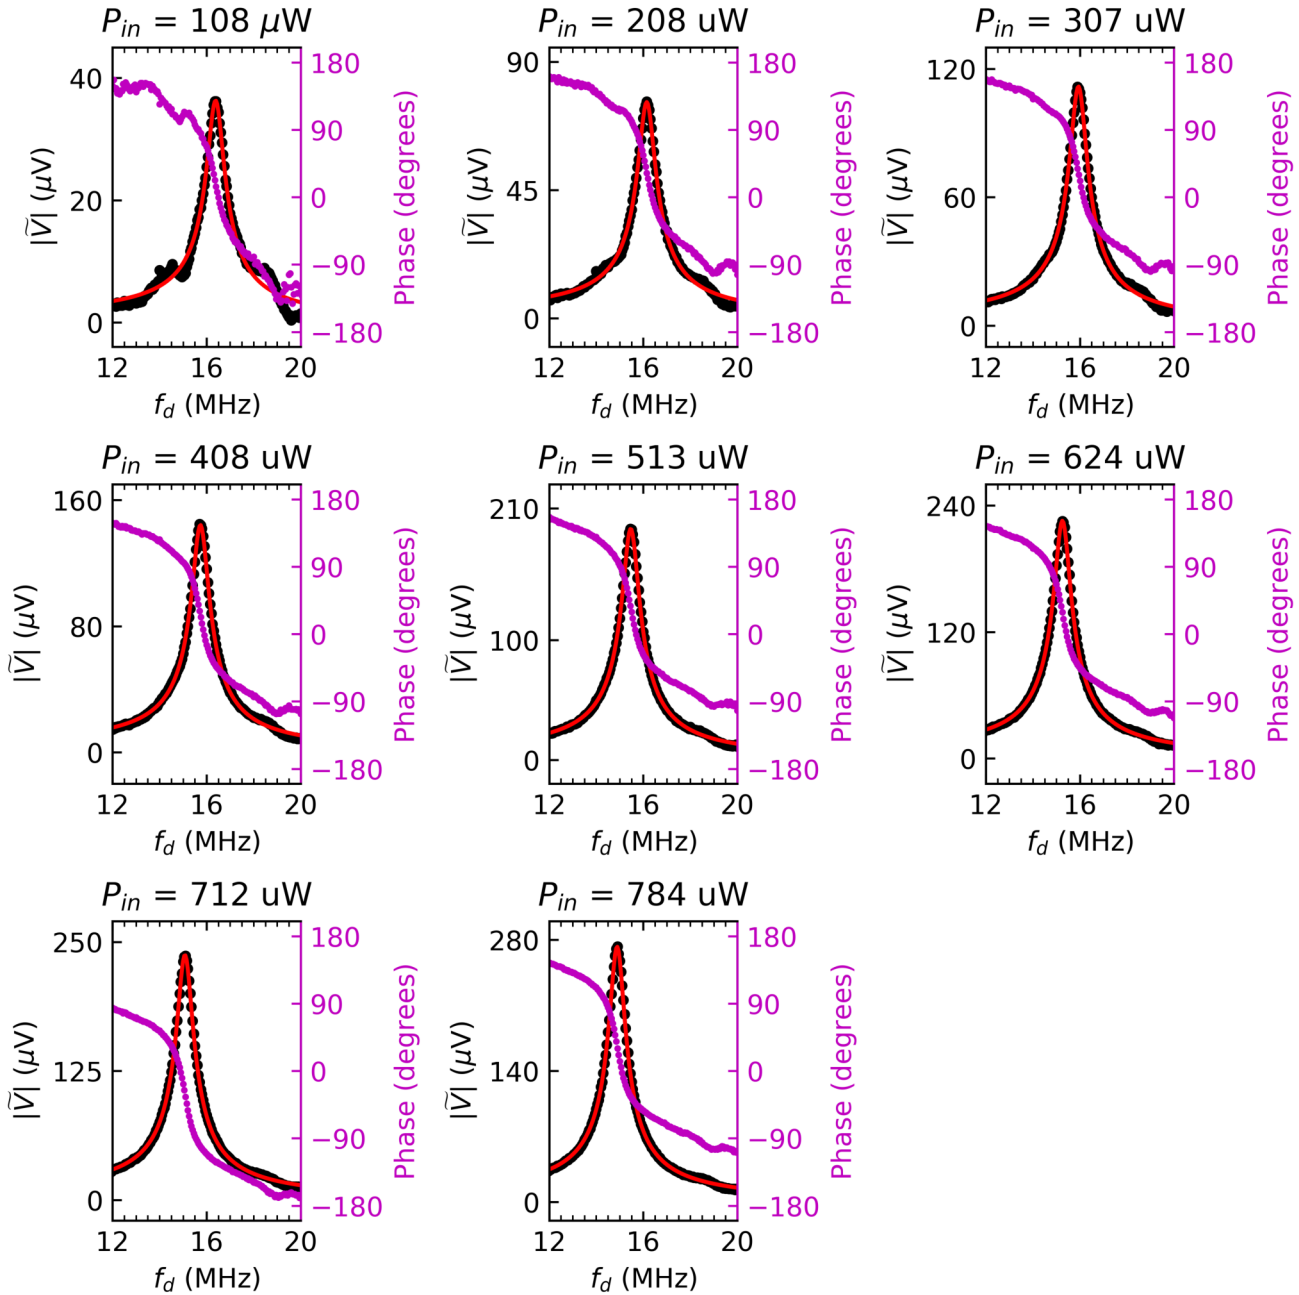

Supplement: s1 [file s1]

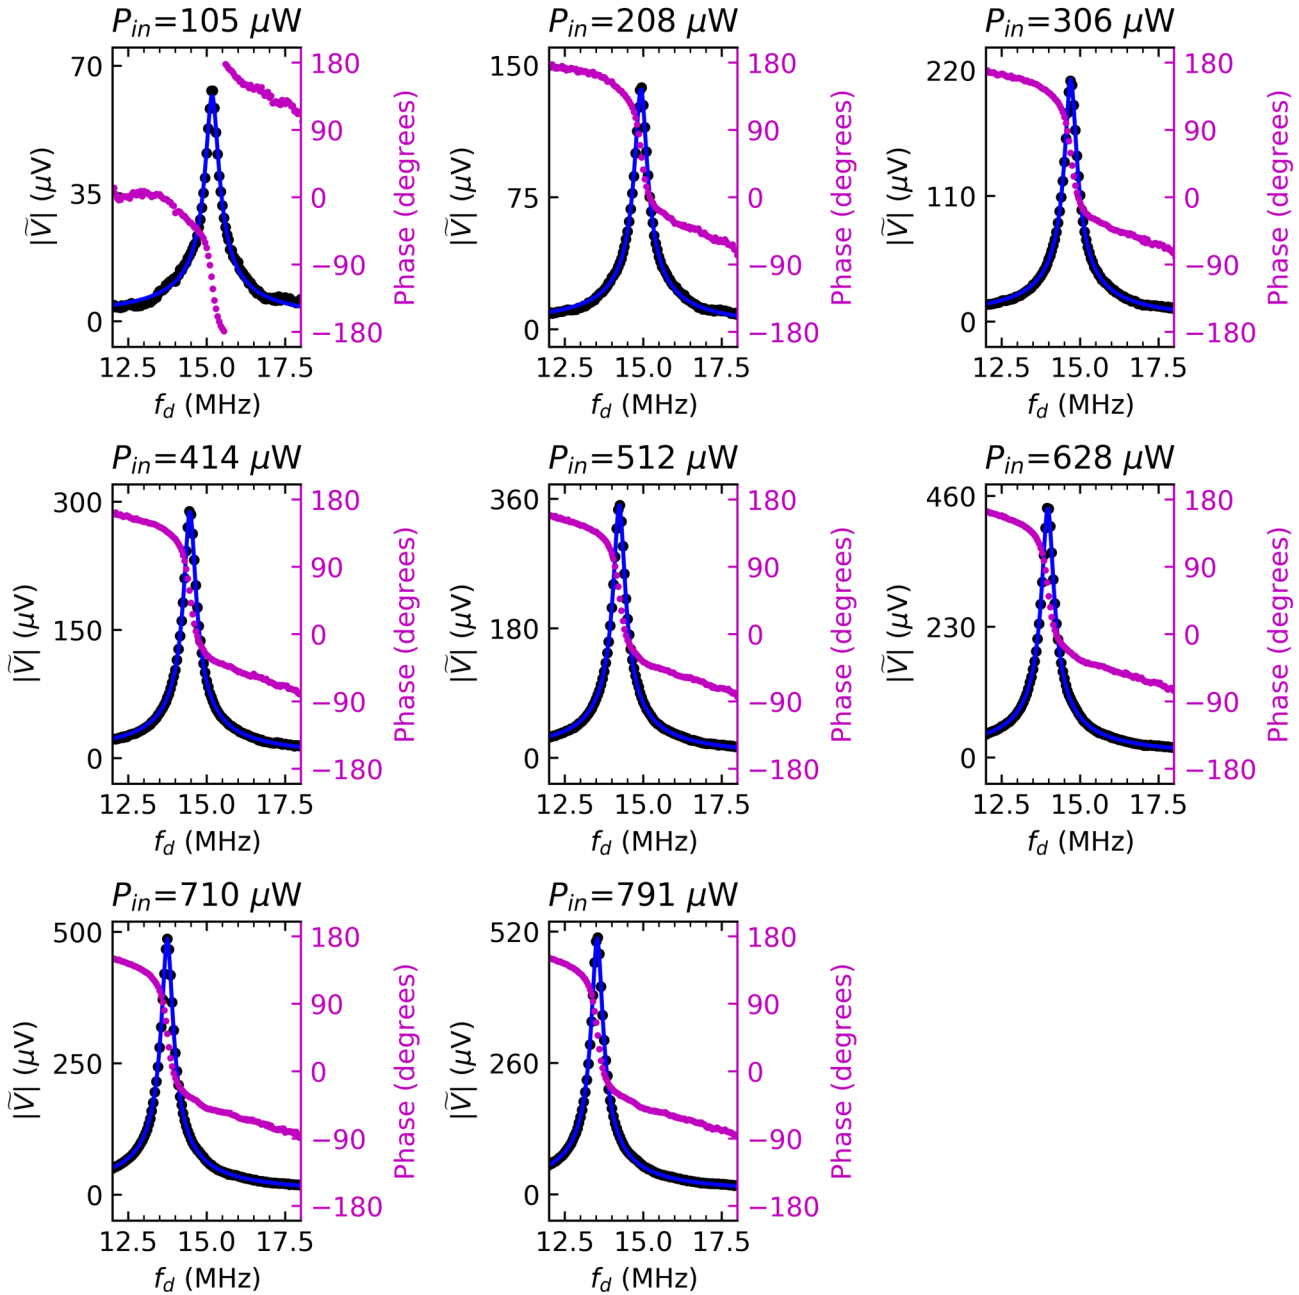

Supplement: s1 [file s1]

(a)

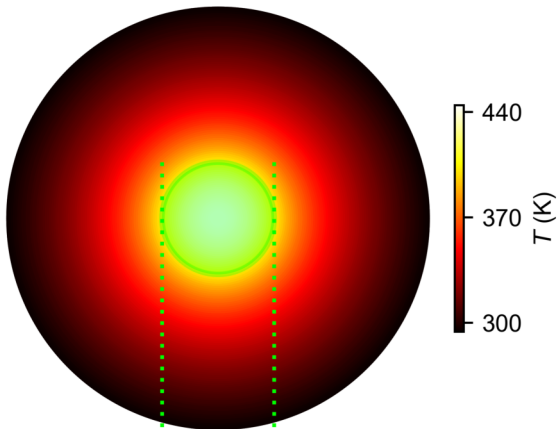

(b)

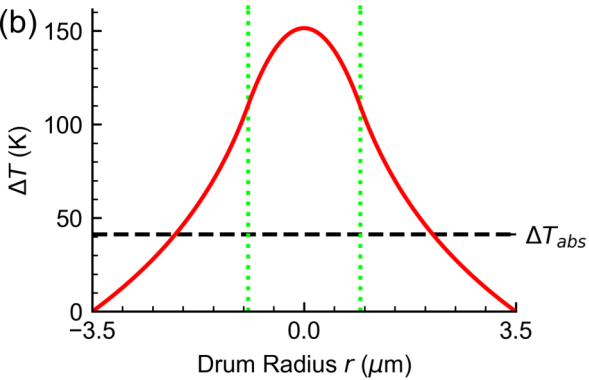

Supplement: s1 [file s1]
